# Supplementary material for: Urologic malignancy risk with chronic Tumor Necrosis Factor-Alpha Inhibitor (TNF-I) exposure: a multicenter, retrospective cohort study
Source: Research Square preprint supplement (doi:10.21203/rs.3.rs-8006664/v1), 2025-12-08

## Supplementary Materials

### Supplementary Methods 1: Index Disease and Comorbidity ICD-9 and ICD-10 codes

#### *Chronic Inflammatory Conditions*

- Crohn's Disease (CD): **ICD-9**=555.0-555.2, 555.9; **ICD-10**=K50.0, K50.1, K50.8, K50.9
- Ulcerative Colitis (UC): **ICD-9**=556.0-556.6, 556.8, 556.9; **ICD-10**=K51.0-K51.5, K51.8, K51.9
- Psoriasis (Ps)/Psoriatic Arthritis (PsA): **ICD-9**=696.0-696.5, 696.8; **ICD-10**=L40.0-L40.4, L40.8
- Rheumatoid Arthritis (RA): **ICD-9**=714.0-714.2, 714.30-714.33, 714.4; **ICD-10**=M05.0-M05.9
- Ankylosing Spondylitis (AS)/Spondyloarthritis (SpA): **ICD-9**=720.20-720.2, 720.8, 720.9; **ICD-10**=M45.0-M45.9
- Hidradenitis Suppurativa (HS): **ICD-9**=705.83; **ICD-10**=L73.2
- Uveitis (UV): **ICD-9**=364.00-364.05; **ICD-10**=H20.00-H20.05, H20.1

#### *Comorbidities*

- Hypertension (HTN): **ICD-9** = 401.0, 401.1, 401.9, 403.00, 403.01, 403.10, 403.11, 403.90, 403.91; **ICD-10** = I10, I11.0, I11.9, I12.0, I12.9
- Hyperlipidemia (HLD): **ICD-9** = 272.4; **ICD-10** = E78.0-E78.5
- Diabetes Mellitus: **ICD-9** = 250.0-250.9; **ICD-10** = E10 (Type 1, 84 sub-codes), E11 (Type II, 84 sub-codes)

- Congestive Heart Failure (CHF): **ICD-9** = 428.0, 428.1, 428.20-428.23, 428.30-428.33, 428.40-428.43, 428.9; **ICD-10** = I50.1-I50.4, I50.8, I50.9
- Coronary Artery Disease (CAD): **ICD-9** = 410.0-410.9 (all .00-.02 only), 411.0, 411.1, 411.81, 411.89, 412, 414.00-414.07, 414.10-414.12, 414.19, 414.2-414.4, 414.8, 414.9; **ICD-10** = I20-I25
- Chronic Kidney Disease (CKD): **ICD-9** = 585.1-585.1, 585.9; **ICD-10** = N18.1-N18.6, N18.9
- Chronic Obstructive Pulmonary Disease (COPD): **ICD-9** = 491-494; **ICD-10** = J41-J44, J47
- HIV/AIDS: **ICD-9** = 042; **ICD-10** = B20
- \*Lynch Syndrome: **ICD-9** = 758.5 (Other conditions due to autosomal abnormalities); **ICD-10** = Z15.02 (ovary), Z15.04 (endometrium), Z15.09 (genetic susceptibility to other malignant neoplasm)
- \*Gardner Syndrome: **ICD-9** = 758.5 (Other conditions due to autosomal abnormalities); **ICD-10** = Z15.09 (genetic susceptibility to other malignant neoplasm)
- \*Li-Fraumeni Syndrome: **ICD-9** = 758.5 (Other conditions due to autosomal abnormalities); **ICD-10** = Z15.01 (breast), Z15.09 (genetic susceptibility to other malignant neoplasm)
- HPV: **ICD-9** = 078.10-078.12, 078.19, 079.4; **ICD-10** = B07.0, B07.8, B07.9
- EBV: **ICD-9** = 075; **ICD-10** = B27.90-B27.92, B27.99
- Hepatitis B (HBV): **ICD-9** = 070.20-070.23, 070.30-070.33; **ICD-10** = B16.0-B16.2, B16.9, B18.0, B18.1, B19.10, B19.11

- Hepatitis C (HCV): **ICD-9** = 070.41, 070.44, 070.51, 070.54, 070.70, 070.71; **ICD-10** = B17.10, B17.11, B18.2, B19.20, B19.21
- H. pylori: **ICD-9** = 041.86; **ICD-10** = B96.81

\*comorbidity can only be identified by generic genetic abnormality ICD-9/10 code

#### Supplementary Methods 2: Urologic Malignancy ICD-9 and ICD-10 Codes.

##### *ICD-9 Codes:*

- Prostate: 185
- Testis: 186
- Bladder: 188
- Kidney: 189
- Corresponding in situ neoplasms: 230-234

##### *ICD-10 Codes:*

- Prostate: C61
- Testis: C62
- Kidney: C64-C65
- Bladder: C66-C67
- Corresponding in situ neoplasms: D00-D09

### Supplementary Methods 3: Prostate Cancer Screening Variables

- Number of encounters for prostate cancer screening: ICD-10 Z12.5
- Initial PSA value
- Number of PSA tests: CPT 84152
- Number of transrectal diagnostic ultrasounds: CPT 76872/76942
- Number of prostate MRI: CPT 72197
- Number of prostate biopsies: CPT 55700/55706
- Abnormal digital rectal examination: ICD-9 796.4
- Prostate induration: ICD-9 600.10/600.11

Supplementary Table 1: System Wide Demographics of Diagnosed Prostate Cancer Patients

|                         | TNF-I Unexposed (n=490) | TNF-I Exposed (n=53) | P-value |
|-------------------------|-------------------------|----------------------|---------|
| Age                     | 61 (54, 69)             | 61 (55, 67)          | >0.9    |
| Follow up time (months) |                         |                      |         |
| Overall                 | 87 (38, 144)            | 101 (56, 168)        | <0.001  |
| Post-exposure           | -                       | 46 (21, 78)          |         |
| Race                    |                         |                      | 0.8     |
| Black                   | 58 (12%)                | 7 (13%)              |         |
| White                   | 421 (86%)               | 46 (87%)             |         |
| Other                   | 11 (2.2%)               | 0 (0%)               |         |
| Smoking                 |                         |                      | 0.059   |
| Current                 | 40 (8.2%)               | 2 (3.8%)             |         |
| Former                  | 214 (44%)               | 16 (30%)             |         |
| Never                   | 236 (48%)               | 35 (66%)             |         |
| TNF-I                   |                         |                      | <0.001  |
| Adalimumab              | 0 (0%)                  | 26 (49%)             |         |
| Infliximab              | 0 (0%)                  | 10 (19%)             |         |
| Etanercept              | 0 (0%)                  | 14 (26%)             |         |
| Certolizumab            | 0 (0%)                  | 2 (3.8%)             |         |
| Golimumab               | 0 (0%)                  | 1 (1.9%)             |         |
| PSA at diagnosis        |                         |                      |         |
| Median (IQR)            | 5.98 (4.26, 8.60)       | 5.00 (3.80, 7.93)    | 0.2     |
| <4                      | 69 (14%)                | 12 (23%)             | 0.3     |
| 4-10                    | 225 (46%)               | 25 (47%)             |         |
| >10                     | 69 (14%)                | 6 (11%)              |         |
| Unknown                 | 127 (26%)               | 10 (19%)             |         |
| Grade Group on Biopsy   |                         |                      | 0.6     |

|                     |           |          |      |
|---------------------|-----------|----------|------|
| 1                   | 165 (34%) | 22 (42%) |      |
| 2                   | 100 (20%) | 10 (19%) |      |
| 3                   | 70 (14%)  | 5 (9%)   |      |
| 4                   | 33 (7%)   | 4 (8%)   |      |
| 5                   | 29 (6%)   | 5 (9%)   |      |
| Unknown             | 93 (19%)  | 7 (13%)  |      |
| # of positive cores |           |          | 0.5  |
| 1                   | 76 (16%)  | 14 (26%) |      |
| 2-6                 | 194 (40%) | 20 (38%) |      |
| 7-10                | 37 (8%)   | 5 (9%)   |      |
| >10                 | 20 (4%)   | 2 (4%)   |      |
| Unknown             | 163 (32%) | 12 (23%) |      |
| Adverse Pathology   |           |          |      |
| EPE                 | 48 (10%)  | 12 (23%) | 0.4  |
| SVI                 | 15 (3%)   | 2 (4%)   | >0.9 |
| LVI                 | 10 (2%)   | 4 (8%)   | 0.3  |
| N1                  | 7 (1%)    | 3 (6%)   | 0.4  |
| M1                  | 37 (8%)   | 4 (8%)   | >0.9 |

\*p < 0.05 considered statistically significant

Supplementary Table 2: System Wide Demographics of Diagnosed Renal Cell Carcinoma

Patients

|                      | TNF-I Unexposed (n=142) | TNF-I Exposed (n=30) | P-value |
|----------------------|-------------------------|----------------------|---------|
| Age                  | 56 (49, 65)             | 58 (50, 64)          | 0.8     |
| Gender               |                         |                      | 0.6     |
| Female               | 74 (52%)                | 14 (47%)             |         |
| Male                 | 68 (48%)                | 16 (53%)             |         |
| Follow up (months)   |                         |                      |         |
| Overall              | 87 (38, 144)            | 101 (56, 168)        | <0.001* |
| Post-exposure        | -                       | 46 (21, 78)          |         |
| Race                 |                         |                      | 0.7     |
| Black                | 23 (16%)                | 5 (17%)              |         |
| White                | 117 (82%)               | 24 (80%)             |         |
| Other                | 2 (2%)                  | 1 (3%)               |         |
| Smoking Status       |                         |                      | 0.3     |
| Current              | 21 (15%)                | 7 (23%)              |         |
| Former               | 55 (39%)                | 8 (27%)              |         |
| Never                | 66 (46%)                | 15 (50%)             |         |
| Clinical Stage at Dx |                         |                      | 0.5     |
| T1                   | 96 (68%)                | 22 (73%)             |         |
| T2                   | 7 (5%)                  | 0 (0%)               |         |
| T3                   | 7 (5%)                  | 3 (10%)              |         |
| T4                   | 4 (3%)                  | 0 (0%)               |         |
| N1/M1                | 5 (4%)                  | 0 (0%)               |         |
| Unknown              | 23 (24%)                | 5 (17%)              |         |
| Surgical Approach    |                         |                      | 0.065   |
| PNx                  | 59 (42%)                | 17 (57%)             |         |

|                           |          |          |        |
|---------------------------|----------|----------|--------|
| RNX                       | 63 (44%) | 8 (26%)  |        |
| None                      | 20 (14%) | 5 (17%)  |        |
| Histologic Subtype        |          |          | 0.3    |
| Chromophobe               | 5 (4%)   | 2 (7%)   |        |
| Clear cell                | 92 (65%) | 22 (73%) |        |
| Papillary                 | 18 (13%) | 1 (3%)   |        |
| Variant                   | 7 (5%)   | 0 (0%)   |        |
| Unknown                   | 20 (14%) | 5 (17%)  |        |
| Recurrence                | 14 (10%) | 1 (3%)   | 0.5    |
| Mortality                 | 23 (24%) | 0 (0%)   | 0.015* |
| Average Year of Diagnosis | 2012     | 2014     |        |

\*p < 0.05 considered statistically significant

Supplementary Table 3: System Wide Demographics of Diagnosed Urothelial Cell Carcinoma

Patients

|                         | TNF-I Unexposed (n=162) | TNF-I Exposed (n=16) | P-value |
|-------------------------|-------------------------|----------------------|---------|
| Age                     | 65 (57, 73)             | 65 (56, 68)          | 0.6     |
| Gender                  |                         |                      | 0.2     |
| Female                  | 59 (36%)                | 3 (19%)              |         |
| Male                    | 103 (64%)               | 13 (81%)             |         |
| Follow up time (months) |                         |                      |         |
| Overall                 | 87 (38, 144)            | 101 (56, 168)        | <0.001* |
| Post-exposure           | -                       | 46 (21, 78)          |         |
| Race                    |                         |                      | >0.9    |
| Black                   | 13 (8%)                 | 1 (6%)               |         |
| White                   | 142 (88%)               | 15 (94%)             |         |
| Other                   | 7 (4%)                  | 0 (0%)               |         |
| Smoking Status          |                         |                      | 0.7     |
| Current                 | 23 (14%)                | 1 (6%)               |         |
| Former                  | 83 (51%)                | 8 (50%)              |         |
| Never                   | 56 (35%)                | 7 (44%)              |         |
| Location                |                         |                      | 0.2     |
| Lower Tract             | 127 (78%)               | 15 (94%)             |         |
| Upper Tract             | 35 (22%)                | 1 (6%)               |         |
| Clinical Stage at Dx    |                         |                      | 0.4     |
| ≤T1                     | 108 (67%)               | 14 (87%)             |         |
| ≥T2                     | 35 (21%)                | 2 (13%)              |         |
| Unknown                 | 19 (12%)                | 0 (0%)               |         |
| Grade at Dx             |                         |                      | >0.9    |
| Low                     | 57 (35%)                | 6 (38%)              |         |

|                    |           |          |       |
|--------------------|-----------|----------|-------|
| High               | 84 (52%)  | 9 (56%)  |       |
| Unknown            | 21 (13%)  | 1 (6%)   |       |
| Number of Tumors   |           |          | 0.4   |
| 1                  | 94 (58%)  | 10 (62%) |       |
| 2+                 | 35 (22%)  | 6 (38%)  |       |
| Unknown            | 33 (20%)  | 0 (0%)   |       |
| Histologic Subtype |           |          | >0.9  |
| Urothelial         | 140 (87%) | 15 (94%) |       |
| Variant            | 10 (6%)   | 1 (6%)   |       |
| Unknown            | 12 (7%)   | 0        |       |
| LN+                | 17 (10%)  | 0 (0%)   | 0.063 |
| Metastasis         | 20 (12%)  | 0 (0%)   | 0.2   |
| Mortality          | 45 (28%)  | 2 (13%)  | 0.2   |

\*p < 0.05 considered statistically significant

Supplementary Table 4: Propensity Score-Adjusted Risk of Urologic Cancers for Adalimumab

|          |                                    | Relative Risk (RR) | 95% CI         | p-value |
|----------|------------------------------------|--------------------|----------------|---------|
| Prostate |                                    |                    |                |         |
|          | Number of Elevated PSA's           | 0.898              | (0.772, 1.045) | 0.163   |
|          | Number of Prostate MRI's           | 0.649              | (0.529, 0.795) | <0.001* |
|          | Number of PNB                      | 1.730              | (0.083, 35.87) | 0.723   |
|          | Elevated PSA at Diagnosis          | 0.961              | (0.853, 1.083) | 0.516   |
|          | Clinical Stage                     | 0.445              | (0.325, 0.61)  | <0.001* |
|          | Biopsy Grade Group 1 vs. 2+        | 1.158              | (1.039, 1.292) | 0.008*  |
|          | Biopsy Grade Group 2- vs. 3+       | 0.669              | (0.529, 0.845) | 0.001*  |
|          | Prostatectomy TNM Stage            | 0.472              | (0.294, 0.756) | 0.002*  |
|          | Prostatectomy Grade Group 1 vs. 2+ | 0.925              | (0.803, 1.067) | 0.286   |
| Bladder  |                                    |                    |                |         |
|          | Number of Locations 1 vs. 2+       | 1.791              | (1.156, 2.773) | 0.009*  |
|          | Grade at Diagnosis                 | 1.489              | (1.202, 1.844) | <0.001* |
|          | Radical Cystectomy                 | 0.001              | (0, Inf)       | 0.989   |
|          |                                    |                    |                |         |
| Kidney   |                                    |                    |                |         |
|          | Clinical Stage 2 or Greater        | 0.991              | (0.626, 1.57)  | 0.970   |
|          | Clinical Stage 3 or Greater        | 1.424              | (0.838, 2.418) | 0.191   |
|          | Pathologic Stage 2 or Greater      | 0.877              | (0.56, 1.375)  | 0.568   |
|          | Pathologic Stage 3 or Greater      | 0.877              | (0.56, 1.375)  | 0.568   |
|          | Partial Nephrectomy                | 1.451              | (1.14, 1.846)  | 0.002*  |
|          | Radical Nephrectomy                | 0.403              | (0.277, 0.586) | <0.001* |

\*p < 0.05 considered statistically significant

Supplementary Table 5: Propensity Score-Adjusted Risk of Urologic Cancers for Infliximab

|          |                                      | Relative Risk (RR) | 95% CI         | p-value |
|----------|--------------------------------------|--------------------|----------------|---------|
| Prostate |                                      |                    |                |         |
|          | Number of Elevated PSA's             | 1.804              | (1.579, 2.062) | <0.001* |
|          | Number of Prostate MRI's             | 1.831              | (1.602, 2.094) | <0.001* |
|          | Elevated PSA at Diagnosis            | 0.759              | (0.664, 0.868) | <0.001* |
|          | Clinical Stage                       | 2.219              | (1.837, 2.679) | <0.001* |
|          | Biopsy Grade Group 1 vs. 2+          | 0.699              | (0.607, 0.805) | <0.001* |
|          | Prostatectomy TNM Stage              | 2.182              | (1.69, 2.818)  | <0.001* |
|          | Prostatectomy Grade Group 1 vs. 2+   | 0.632              | (0.552, 0.724) | <0.001* |
| Bladder  |                                      |                    |                |         |
|          | Higher Pathologic Stage at Diagnosis | 0.852              | (0.437, 1.663) | 0.639   |
|          | Radical Cystectomy                   | 0.788              | (0.414, 1.5)   | 0.468   |
| Kidney   |                                      |                    |                |         |
|          | Clinical Stage 2 or Greater          | 1.314              | (0.754, 2.291) | 0.335   |
|          | Clinical Stage 3 or Greater          | 1.873              | (1.008, 3.478) | 0.047*  |
|          | Pathologic Stage 2 or Greater        | 1.163              | (0.674, 2.008) | 0.588   |
|          | Pathologic Stage 3 or Greater        | 1.163              | (0.674, 2.008) | 0.588   |

\*p < 0.05 considered statistically significant

Supplementary Table 6: Propensity Score-Adjusted Risk of Urologic Cancers for Etanercept

|          |                                    | Relative Risk (RR) | 95% CI         | p-value |
|----------|------------------------------------|--------------------|----------------|---------|
| Prostate |                                    |                    |                |         |
|          | Number of Elevated PSA's           | 1.080              | (0.94, 1.242)  | 0.278   |
|          | Number of Prostate MRI's           | 0.693              | (0.565, 0.85)  | <0.001* |
|          | Elevated PSA at Diagnosis          | 0.516              | (0.428, 0.623) | <0.001* |
|          | Clinical Stage                     | 0.473              | (0.337, 0.664) | <0.001* |
|          | Biopsy Grade Group 1 vs. 2+        | 0.877              | (0.771, 0.998) | 0.046*  |
|          | Biopsy Grade Group 2- vs. 3+       | 1.531              | (1.288, 1.82)  | <0.001* |
|          | Prostatectomy Grade Group 1 vs. 2+ | 1.178              | (1.072, 1.294) | <0.001* |
| Bladder  |                                    |                    |                |         |
|          | Number of Tumors                   | 0.001              | (0, Inf)       | 0.991   |
|          | Grade at Diagnosis                 | 1.213              | (0.97, 1.516)  | 0.090   |
|          | Radical Cystectomy                 | 0.001              | (0, Inf)       | 0.991   |
| Kidney   |                                    |                    |                |         |
|          | Pathologic Stage 2 or Greater      | 0.903              | (0.239, 3.421) | 0.881   |
|          | Radical Nephrectomy                | 0.254              | (0.063, 1.026) | 0.054   |

\*p < 0.05 considered statistically significant

Supplementary Figure 1: Forest Plot of Odds Ratio of Prostate Cancer for Each Autoimmune Disease Type

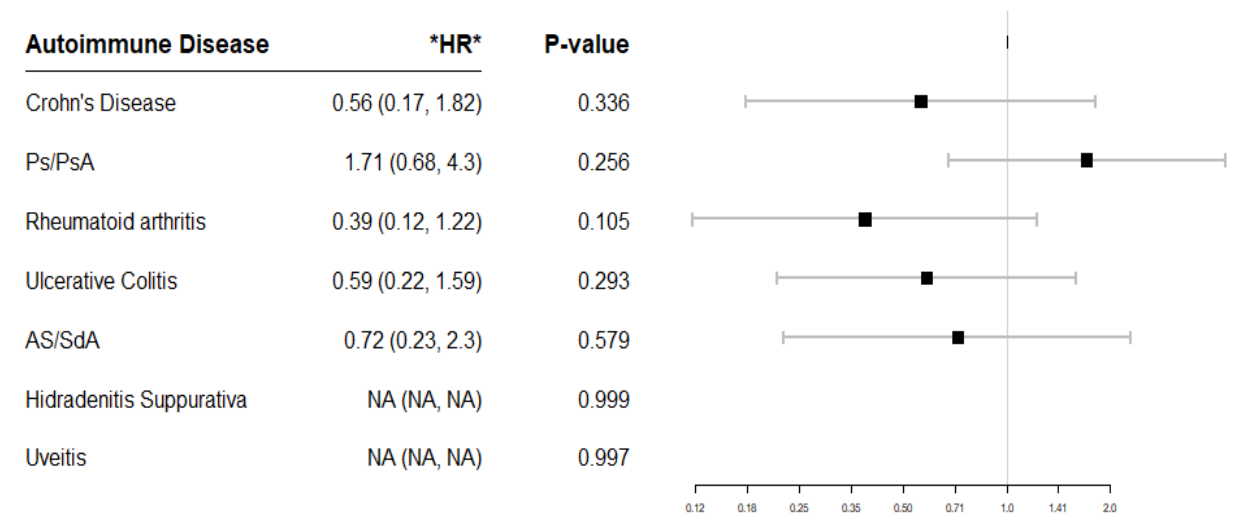

Supplementary Figure 2: Multivariable regression of PCa diagnosis risk controlled for number of screening PSA's (Sensitivity Analysis)

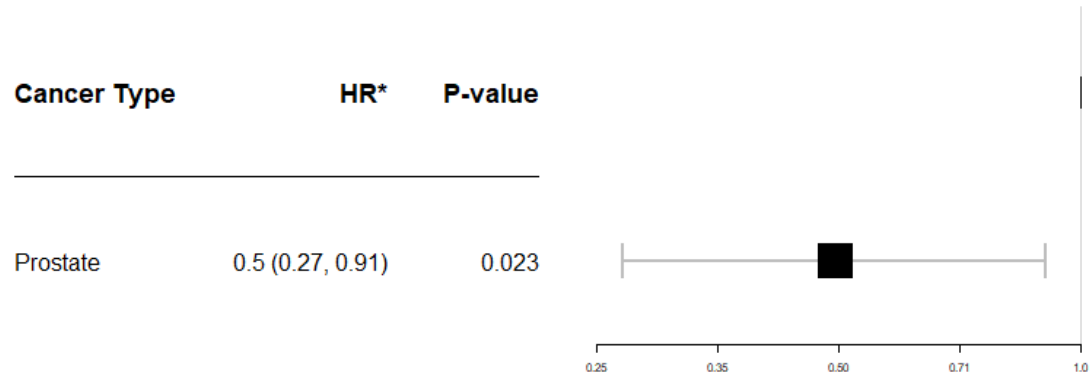

Supplement: Supplementary file 1 [file 821ccddcb3e99367120f5a01.pdf]
